# Supplementary material for: Metabolic Signature of Pluripotent Stem Cells
Source: PubMed Central journal article supplement (PMC6004998; doi:10.22074/cellj.2018.5514), 2018-05-28
Supplement: Cell-J-20-388-s01.pdf [file Cell-J-20-388-s01.pdf]

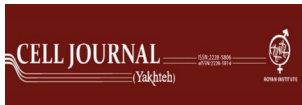

## Supplementary Information for

# Metabolic Signature of Pluripotent Stem Cells

Sara Taleahmad, Ph.D.<sup>1, 2</sup>, Seyedeh Nafiseh Hassani, Ph.D.<sup>2</sup>, Ghasem Hosseini Salekdeh, Ph.D.<sup>1, 3\*</sup>,  
Hossein Baharvand, Ph.D.<sup>2, 4\*</sup>

1. Department of Molecular Systems Biology, Cell Science Research Center, Royan Institute for Stem Cell Biology and Technology, ACECR, Tehran, Iran
2. Department of Stem Cells and Developmental Biology, Cell Science Research Center, Royan Institute for Stem Cell Biology and Technology, ACECR, Tehran, Iran
3. Department of Systems Biology, Agricultural Biotechnology Research Institute of Iran, Karaj, Iran
4. Department of Developmental Biology, University of Science and Culture, ACECR, Tehran, Iran

*\*Corresponding Addresses: P.O.Box: 16635-148, Department of Molecular Systems Biology, Cell Science Research Center, Royan Institute for Stem Cell Biology and Technology, ACECR, Tehran, Iran*

*P.O.Box: 16635-148, Department of Stem Cells and Developmental Biology, Cell Science Research Center, Royan Institute for Stem Cell Biology and Technology, ACECR, Tehran, Iran*

*Emails: salekdeh@royanInstitute.org, baharvand@royanInstitute.org*

**Table S1:** List of up- regulated proteins between R2i and 2i versus serum

| R2i versus serum |           |           |      |      | 2i versus serum |           |           |      |      |
|------------------|-----------|-----------|------|------|-----------------|-----------|-----------|------|------|
| Pgm1             | 0.000135  | 5.74E-05  | 0.05 | 2.35 | Lig1            | 0.0003214 | 0.0002097 | 0.05 | 1.53 |
| Glb1             | 0.0001217 | 5.95E-05  | 0.05 | 2.05 | Mrps17          | 0.0003511 | 7.76E-05  | 0.05 | 4.52 |
| Renbp            | 0.0001076 | 3.03E-05  | 0.05 | 3.54 | Ckb             | 0.0009502 | 0.0005902 | 0.05 | 1.61 |
| Cox15            | 7.66E-05  | 2.26E-05  | 0.05 | 3.39 | Plcb3           | 3.01E-05  | 1.05E-05  | 0.05 | 2.86 |
| Pold2            | 7.58E-05  | 2.03E-05  | 0.05 | 3.73 | Sbno1           | 2.46E-05  | 6.71E-06  | 0.05 | 3.66 |
| Nipsnap1         | 0.0002916 | 0.0001804 | 0.05 | 1.62 | Etfb            | 0.000539  | 0.0001136 | 0.05 | 4.75 |
| Rbm7             | 0.0001304 | 4.84E-05  | 0.05 | 2.69 | Ppp1r7          | 0.0002211 | 9.57E-05  | 0.05 | 2.31 |
| Asah1            | 0.0001442 | 4.19E-05  | 0.05 | 3.44 | Dnmt1           | 4.18E-05  | 2.16E-05  | 0.05 | 1.94 |
| Amt              | 0.0003458 | 0.0001363 | 0.05 | 2.54 | Hsp90b1         | 0.0028659 | 0.0019932 | 0.05 | 1.44 |
| Smarcc1          | 0.0002581 | 0.0001366 | 0.05 | 1.89 | Tigar           | 0.0006109 | 0.0003772 | 0.05 | 1.62 |
| Clic4            | 0.000626  | 0.0005116 | 0.05 | 1.22 | Cox15           | 0.0001236 | 2.27E-05  | 0.05 | 5.45 |
| Akr7a5           | 0.0001067 | 2.53E-05  | 0.05 | 4.21 | Cdk7            | 0.0001806 | 0.0001125 | 0.05 | 1.61 |
| Pgd              | 0.0005854 | 0.0004638 | 0.05 | 1.26 | Ndufs1          | 0.000213  | 8.61E-05  | 0.05 | 2.47 |
| Fermt2           | 0.00013   | 9.83E-05  | 0.05 | 1.32 | Canx            | 0.0013489 | 0.0009372 | 0.05 | 1.44 |
| Sf3b1            | 0.0003709 | 0.0002744 | 0.04 | 1.35 | Psm5            | 0.0002211 | 0.0001232 | 0.04 | 1.80 |
| Elavl1           | 0.0009206 | 0.0005227 | 0.04 | 1.76 | Esyt1           | 7.08E-05  | 2.59E-05  | 0.04 | 2.74 |
| Hdgf             | 0.0007758 | 0.0005599 | 0.04 | 1.39 | Slc25a20        | 0.0003562 | 6.93E-05  | 0.04 | 5.14 |
| Coro1b           | 9.58E-05  | 2.67E-05  | 0.04 | 3.60 | Pgk1            | 0.0025007 | 0.0019652 | 0.04 | 1.27 |
| Hnrnp3           | 0.0002302 | 9.54E-05  | 0.04 | 2.41 | Prdx2           | 0.0027128 | 0.0020692 | 0.04 | 1.31 |
| Cyb5r3           | 0.0008781 | 0.0004906 | 0.04 | 1.79 | Cdk2            | 0.0002528 | 0.000155  | 0.04 | 1.63 |
| Lars             | 0.0003676 | 0.0002092 | 0.04 | 1.76 | Wapl            | 4.07E-05  | 2.02E-05  | 0.04 | 2.02 |
| Timm44           | 0.0001332 | 3.67E-05  | 0.04 | 3.62 | Cdv3            | 0.0004032 | 9.39E-05  | 0.04 | 4.29 |
| Kras             | 0.0004108 | 8.58E-05  | 0.04 | 4.79 | Isyna1          | 0.0003254 | 0.0001885 | 0.04 | 1.73 |
| Slc25a5          | 0.0039652 | 0.0031383 | 0.04 | 1.26 | Skiv2l2         | 0.0002199 | 6.51E-05  | 0.04 | 3.38 |
| Iars             | 0.000347  | 0.0002051 | 0.04 | 1.69 | Mcm6            | 0.0007446 | 0.0005096 | 0.04 | 1.46 |
| Esyt1            | 7.94E-05  | 2.57E-05  | 0.04 | 3.08 | Snx5            | 0.0001457 | 3.13E-05  | 0.04 | 4.66 |
| Impa2            | 0.0006045 | 0.0002026 | 0.04 | 2.98 | Asna1           | 0.0004725 | 0.0002515 | 0.04 | 1.88 |
| Gars             | 0.0009249 | 0.0006513 | 0.04 | 1.42 | Sod1            | 0.0027449 | 0.0015581 | 0.04 | 1.76 |
| Mthfd2           | 0.0003764 | 0.0001917 | 0.04 | 1.96 | Sdhd            | 0.0003203 | 9.79E-05  | 0.04 | 3.27 |
| Skiv2l2          | 0.0001555 | 6.49E-05  | 0.04 | 2.40 | Smc3            | 8.60E-05  | 2.81E-05  | 0.04 | 3.06 |
| Ilf2             | 0.0004379 | 0.0002159 | 0.04 | 2.03 | Hspa9           | 0.0019751 | 0.0013765 | 0.04 | 1.43 |
| Hars             | 0.0002269 | 0.0001045 | 0.04 | 2.17 | Sars2           | 6.30E-05  | 1.77E-05  | 0.04 | 3.56 |
| U2surp           | 4.57E-05  | 2.74E-05  | 0.04 | 1.66 | Prkesh          | 0.0002373 | 0.0001381 | 0.04 | 1.72 |
| Acat2            | 0.0002657 | 0.0001249 | 0.03 | 2.13 | Calu            | 0.0001191 | 2.81E-05  | 0.04 | 4.24 |

**Table S1:** Continued

| <b>R2i versus serum</b> |           |           |      |      | <b>Zi versus serum</b> |           |           |      |      |
|-------------------------|-----------|-----------|------|------|------------------------|-----------|-----------|------|------|
| Rab14                   | 0.0010775 | 0.0008058 | 0.03 | 1.34 | Pafah1b1               | 0.0001194 | 6.69E-05  | 0.04 | 1.78 |
| Cam1                    | 0.0001322 | 5.74E-05  | 0.03 | 2.31 | Kras                   | 0.0004484 | 8.60E-05  | 0.03 | 5.21 |
| Pfas                    | 0.0004521 | 0.0002708 | 0.03 | 1.67 | Ldhb                   | 0.0014666 | 0.0006105 | 0.03 | 2.40 |
| Hadh                    | 0.0017938 | 0.0008967 | 0.03 | 2.00 | Usp10                  | 0.0001022 | 2.63E-05  | 0.03 | 3.89 |
| Slc12a7                 | 5.02E-05  | 1.21E-05  | 0.03 | 4.14 | Slc1a5                 | 7.01E-05  | 1.79E-05  | 0.03 | 3.91 |
| Rab10                   | 0.0010358 | 0.0008376 | 0.03 | 1.24 | Ldah                   | 0.0001376 | 6.15E-05  | 0.03 | 2.24 |
| Smarca4                 | 4.24E-05  | 2.40E-05  | 0.03 | 1.77 | Cul5                   | 3.72E-05  | 1.95E-05  | 0.03 | 1.90 |
| Mrpl15                  | 0.0001772 | 6.78E-05  | 0.03 | 2.61 | Asah1                  | 0.0001669 | 4.21E-05  | 0.03 | 3.96 |
| Srrm2                   | 2.11E-05  | 5.07E-06  | 0.03 | 4.16 | Nelfb                  | 5.43E-05  | 1.58E-05  | 0.03 | 3.43 |
| Aars                    | 0.0010562 | 0.0007546 | 0.03 | 1.40 | Actr10                 | 8.62E-05  | 2.23E-05  | 0.03 | 3.86 |
| Aco2                    | 0.0002884 | 0.0001772 | 0.03 | 1.63 | Pabpn1                 | 0.0001524 | 3.22E-05  | 0.03 | 4.73 |
| Sgpl1                   | 4.87E-05  | 1.64E-05  | 0.03 | 2.97 | Copz1                  | 0.0005185 | 0.0002784 | 0.03 | 1.86 |
| Slc25a20                | 0.0005093 | 6.90E-05  | 0.03 | 7.39 | ND4                    | 0.0004092 | 0.0001887 | 0.03 | 2.17 |
| Anxa11                  | 0.0001338 | 8.05E-05  | 0.03 | 1.66 | Srsf6                  | 0.0002689 | 0.0001233 | 0.03 | 2.18 |
| Gga2                    | 5.99E-05  | 1.58E-05  | 0.03 | 3.79 | Psph                   | 0.0004298 | 0.0001409 | 0.03 | 3.05 |
| Ndufv2                  | 0.000144  | 3.82E-05  | 0.03 | 3.77 | Myl12b                 | 0.0003817 | 7.35E-05  | 0.03 | 5.19 |
| Ncapd3                  | 1.83E-05  | 6.11E-06  | 0.03 | 3.00 | Nsfl1c                 | 0.0002406 | 8.64E-05  | 0.03 | 2.78 |
| Tsfm                    | 0.0003092 | 0.0001351 | 0.03 | 2.29 | Vat1                   | 0.0001773 | 6.26E-05  | 0.03 | 2.83 |
| Pleckstrin              | 2.96E-05  | 8.79E-06  | 0.03 | 3.37 | Rps9                   | 0.0032942 | 0.0029339 | 0.03 | 1.12 |
| Galk1                   | 0.0007194 | 0.0003862 | 0.03 | 1.86 | Pgd                    | 0.000607  | 0.0004658 | 0.03 | 1.30 |
| Deps                    | 0.0002479 | 0.0001223 | 0.03 | 2.03 | Pdia4                  | 0.0006976 | 0.0003954 | 0.03 | 1.76 |
| Acin1                   | 4.82E-05  | 9.61E-06  | 0.03 | 5.01 | Prmt1                  | 0.0009174 | 0.0007494 | 0.02 | 1.22 |
| Mvd                     | 8.94E-05  | 2.34E-05  | 0.02 | 3.82 | Parp1                  | 0.0001866 | 6.45E-05  | 0.02 | 2.89 |
| Aifm1                   | 0.0001836 | 7.17E-05  | 0.02 | 2.56 | Tmx2                   | 0.0003558 | 0.0001775 | 0.02 | 2.01 |
| Calu                    | 9.50E-05  | 2.80E-05  | 0.02 | 3.40 | Plaa                   | 0.0002079 | 0.0001311 | 0.02 | 1.59 |
| Rab5b                   | 0.000515  | 0.0003056 | 0.02 | 1.69 | Aldoa                  | 0.0044785 | 0.0031054 | 0.02 | 1.44 |
| Rcc2                    | 0.0006915 | 0.0005298 | 0.02 | 1.31 | Amt                    | 0.000334  | 0.0001369 | 0.02 | 2.44 |
| Hprt                    | 0.0012327 | 0.0009354 | 0.02 | 1.32 | Ero11                  | 0.0001512 | 2.66E-05  | 0.02 | 5.68 |
| Myo1b                   | 3.94E-05  | 7.79E-06  | 0.02 | 5.06 | Aifm1                  | 0.000195  | 7.21E-05  | 0.02 | 2.71 |
| Pafah1b1                | 0.0001103 | 6.67E-05  | 0.02 | 1.65 | Pitrm1                 | 0.0001089 | 4.43E-05  | 0.02 | 2.46 |
| Scpep1                  | 0.0001016 | 4.46E-05  | 0.02 | 2.28 | Eif4b                  | 0.000445  | 0.0002622 | 0.02 | 1.70 |
| Fdps                    | 0.0008785 | 0.0006277 | 0.02 | 1.40 | Psm3                   | 0.0007135 | 0.0004341 | 0.02 | 1.64 |
| Ero11                   | 0.0001634 | 2.66E-05  | 0.02 | 6.15 | Naxe                   | 0.0001997 | 7.38E-05  | 0.02 | 2.71 |
| Parp1                   | 0.0001656 | 6.43E-05  | 0.02 | 2.58 | Xpo4                   | 7.59E-05  | 1.11E-05  | 0.02 | 6.81 |

Table S1: Continued

| R2i versus serum |           |           |      |      | 2i versus serum |           |           |      |      |
|------------------|-----------|-----------|------|------|-----------------|-----------|-----------|------|------|
| Nampt            | 0.0001375 | 8.61E-05  | 0.02 | 1.60 | Bsg             | 0.0004835 | 6.28E-05  | 0.02 | 7.70 |
| Psmc4            | 0.0009013 | 0.0005993 | 0.02 | 1.50 | Ogdhl           | 0.0001367 | 1.59E-05  | 0.02 | 8.61 |
| Llgl2            | 4.91E-05  | 9.05E-06  | 0.02 | 5.43 | Atp2a2          | 0.0003749 | 0.0001755 | 0.02 | 2.14 |
| Ldhb             | 0.0014798 | 0.0006077 | 0.02 | 2.44 | Pdia6           | 0.0009001 | 0.0005514 | 0.02 | 1.63 |
| Atp5a1           | 0.0016994 | 0.0013572 | 0.02 | 1.25 | Pgm1            | 0.0001923 | 5.76E-05  | 0.02 | 3.34 |
| Wapl             | 6.26E-05  | 2.01E-05  | 0.02 | 3.12 | Yars            | 0.000333  | 0.0001555 | 0.02 | 2.14 |
| Ckb              | 0.0012344 | 0.0005875 | 0.02 | 2.10 | Coro1b          | 0.0001675 | 2.67E-05  | 0.02 | 6.27 |
| Cstf3            | 0.0001271 | 4.23E-05  | 0.02 | 3.01 | Mrps9           | 0.0002028 | 7.86E-05  | 0.02 | 2.58 |
| Otub1            | 0.0003874 | 0.0001515 | 0.02 | 2.56 | Adh5            | 0.0006507 | 0.0003416 | 0.02 | 1.90 |
| Acp6             | 0.0001338 | 3.06E-05  | 0.02 | 4.37 | Arhgef2         | 4.64E-05  | 2.11E-05  | 0.02 | 2.20 |
| Aldoa            | 0.003942  | 0.0030923 | 0.02 | 1.27 | Rbm26           | 4.81E-05  | 5.63E-06  | 0.02 | 8.55 |
| Naxe             | 0.0001658 | 7.35E-05  | 0.02 | 2.26 | Xrn2            | 4.24E-05  | 2.87E-05  | 0.02 | 1.48 |
| Akap1            | 3.41E-05  | 6.75E-06  | 0.02 | 5.05 | Echs1           | 0.0003964 | 0.0001651 | 0.02 | 2.40 |
| Ccar1            | 2.99E-05  | 7.79E-06  | 0.02 | 3.83 | Tomm70a         | 0.0002081 | 0.000114  | 0.02 | 1.83 |
| Gcdh             | 8.75E-05  | 2.09E-05  | 0.02 | 4.18 | Slc2a3          | 0.0010215 | 0.000604  | 0.02 | 1.69 |
| Eif5b            | 0.0001637 | 9.81E-05  | 0.02 | 1.67 | Cpt1a           | 4.64E-05  | 1.18E-05  | 0.01 | 3.93 |
| Prkag1           | 0.0001597 | 6.07E-05  | 0.02 | 2.63 | Rpl35           | 0.0025232 | 0.0014195 | 0.01 | 1.78 |
| Rpf2             | 0.0001378 | 7.23E-05  | 0.02 | 1.91 | Akap12          | 0.0003917 | 0.0002101 | 0.01 | 1.86 |
| Slc25a13         | 0.0005985 | 0.0002756 | 0.02 | 2.17 | Rfc2            | 0.0001598 | 8.06E-05  | 0.01 | 1.98 |
| Fkbp5            | 0.0001183 | 4.49E-05  | 0.02 | 2.64 | Nedd4           | 0.0005116 | 0.0003099 | 0.01 | 1.65 |
| Taldo1           | 0.001254  | 0.0007148 | 0.02 | 1.75 | Lrpprc          | 0.0003741 | 0.0001716 | 0.01 | 2.18 |
| Etfa             | 0.0011664 | 0.0003961 | 0.02 | 2.94 | Pgm2            | 0.0004393 | 7.14E-05  | 0.01 | 6.15 |
| Sart3            | 0.0001073 | 3.22E-05  | 0.01 | 3.34 | Calr            | 0.0016756 | 0.0011118 | 0.01 | 1.51 |
| Rpap1            | 3.60E-05  | 6.72E-06  | 0.01 | 5.36 | Phb             | 0.0026436 | 0.0018071 | 0.01 | 1.46 |
| RNA-             | 0.0002869 | 3.70E-05  | 0.01 | 7.76 | Gm10705         | 0.0015344 | 0.0012888 | 0.01 | 1.19 |
| Rfc5             | 0.0002014 | 0.0001031 | 0.01 | 1.95 | Nup85           | 0.0001194 | 6.39E-05  | 0.01 | 1.87 |
| Nup214           | 3.41E-05  | 1.27E-05  | 0.01 | 2.69 | Wdr18           | 0.000251  | 0.0001717 | 0.01 | 1.46 |
| Psm5             | 0.0002915 | 0.0001227 | 0.01 | 2.38 | Diaph1          | 0.0001249 | 6.13E-05  | 0.01 | 2.04 |
| Sf3b2            | 7.40E-05  | 1.48E-05  | 0.01 | 4.99 | Myo1b           | 4.21E-05  | 7.82E-06  | 0.01 | 5.38 |
| Fxr2             | 9.21E-05  | 1.95E-05  | 0.01 | 4.71 | Pgpep1          | 0.0002887 | 0.0001002 | 0.01 | 2.88 |
| Dnajc7           | 0.0002309 | 9.91E-05  | 0.01 | 2.33 | Pfas            | 0.0004608 | 0.000272  | 0.01 | 1.69 |
| Nelfb            | 6.62E-05  | 1.58E-05  | 0.01 | 4.19 | Pgam1           | 0.0049751 | 0.003787  | 0.01 | 1.31 |
| Crk              | 0.0001402 | 6.72E-05  | 0.01 | 2.09 | Set             | 0.0020568 | 0.0014015 | 0.01 | 1.47 |
| Actl6a           | 0.0002742 | 0.0001532 | 0.01 | 1.79 | Aldh2           | 0.0004545 | 0.0002837 | 0.01 | 1.60 |

Table S1: Continued

| R2i versus serum |           |           |      |      | 2i versus serum |           |           |      |       |
|------------------|-----------|-----------|------|------|-----------------|-----------|-----------|------|-------|
| Snrpa1           | 0.0007785 | 0.0004469 | 0.01 | 1.74 | Scepe1          | 0.0001009 | 4.48E-05  | 0.01 | 2.25  |
| Aldh2            | 0.0003978 | 0.0002825 | 0.01 | 1.41 | Gcdh            | 0.0001249 | 2.10E-05  | 0.01 | 5.95  |
| Uggt1            | 0.0002006 | 0.0001352 | 0.01 | 1.48 | Lbr             | 0.0001792 | 0.0001135 | 0.01 | 1.58  |
| Pck2             | 0.0001316 | 1.40E-05  | 0.01 | 9.39 | Fkbp5           | 0.0001626 | 4.51E-05  | 0.01 | 3.61  |
| Sf3a1            | 0.0001848 | 8.18E-05  | 0.01 | 2.26 | Hnrmp11         | 0.0001504 | 6.81E-05  | 0.01 | 2.21  |
| Pabpn1           | 0.0001733 | 3.20E-05  | 0.01 | 5.41 | Eci1            | 0.0005045 | 0.0002646 | 0.01 | 1.91  |
| Lrpprc           | 0.0002819 | 0.0001709 | 0.01 | 1.65 | Ass1            | 0.0006549 | 0.0003071 | 0.01 | 2.13  |
| Pold1            | 0.0002402 | 4.18E-05  | 0.01 | 5.74 | Slc25a13        | 0.0007079 | 0.0002767 | 0.01 | 2.56  |
| Hells            | 4.07E-05  | 6.53E-06  | 0.01 | 6.23 | Asns            | 0.0006564 | 0.0003593 | 0.01 | 1.83  |
| P4ha1            | 5.83E-05  | 1.02E-05  | 0.01 | 5.72 | Hspa4           | 0.0018103 | 0.0014335 | 0.01 | 1.26  |
| Qprt             | 0.0001122 | 1.97E-05  | 0.01 | 5.69 | Msh6            | 0.0006953 | 0.0003794 | 0.01 | 1.83  |
| Nop58            | 0.0001261 | 5.15E-05  | 0.01 | 2.45 | Aldoat1         | 0.0016993 | 0.0011323 | 0.01 | 1.50  |
| Msh6             | 0.0006565 | 0.0003777 | 0.01 | 1.74 | Suclg2          | 0.0001658 | 2.22E-05  | 0.01 | 7.46  |
| Usp9x            | 0.0001795 | 0.0001049 | 0.01 | 1.71 | Aco2            | 0.0003829 | 0.000178  | 0.01 | 2.15  |
| Shmt2            | 0.0005413 | 0.0002207 | 0.01 | 2.45 | Pycr1           | 0.0003143 | 3.19E-05  | 0.01 | 9.87  |
| Got1             | 0.0012227 | 0.000569  | 0.01 | 2.15 | Shmt1           | 0.0002651 | 0.0001623 | 0.01 | 1.63  |
| Sars             | 0.0007798 | 0.0003583 | 0.01 | 2.18 | Cfdp1           | 0.0002833 | 3.16E-05  | 0.01 | 8.96  |
| Diaph1           | 0.0001955 | 6.10E-05  | 0.01 | 3.20 | Lonp1           | 0.0002308 | 3.73E-05  | 0.01 | 6.19  |
| Pycr1            | 0.0001854 | 3.18E-05  | 0.01 | 5.84 | Smarca4         | 3.64E-05  | 2.41E-05  | 0.01 | 1.51  |
| Copa             | 0.0002041 | 0.0001273 | 0.01 | 1.60 | Tsfm            | 0.0002823 | 0.0001357 | 0.01 | 2.08  |
| Ncapd2           | 0.0002647 | 0.0002091 | 0.01 | 1.27 | Dcps            | 0.0002555 | 0.0001229 | 0.01 | 2.08  |
| Upp1             | 0.0013234 | 0.0002969 | 0.01 | 4.46 | Nipsnap2        | 0.0001272 | 1.90E-05  | 0.01 | 6.71  |
| Suclg2           | 0.0001463 | 2.21E-05  | 0.01 | 6.62 | Aars            | 0.0014658 | 0.0007579 | 0.01 | 1.93  |
| Adh5             | 0.0007601 | 0.0003402 | 0.01 | 2.23 | Pmvk            | 0.0004548 | 3.18E-05  | 0.00 | 14.29 |
| Eif4g2           | 3.56E-05  | 6.35E-06  | 0.01 | 5.60 | Dnpep           | 0.0002189 | 0.0001074 | 0.00 | 2.04  |
| Rab5a            | 0.0007946 | 0.0004652 | 0.01 | 1.71 | Cars            | 0.0002711 | 9.44E-05  | 0.00 | 2.87  |
| Metap2           | 6.56E-05  | 1.17E-05  | 0.01 | 5.59 | Got1            | 0.0013309 | 0.0005714 | 0.00 | 2.33  |
| As3mt            | 8.48E-05  | 1.49E-05  | 0.01 | 5.70 | Mrpl15          | 0.0002065 | 6.81E-05  | 0.00 | 3.03  |
| Acat1            | 7.91E-05  | 1.39E-05  | 0.01 | 5.70 | Supt16          | 0.0001005 | 3.65E-05  | 0.00 | 2.76  |
| Ccdc12           | 0.000293  | 9.86E-05  | 0.01 | 2.97 | Uqcr2           | 0.0007223 | 0.0003244 | 0.00 | 2.23  |
| Pfkip            | 0.0003035 | 9.00E-05  | 0.00 | 3.37 | Aldh18a1        | 0.0003277 | 0.0001127 | 0.00 | 2.91  |
| Rab1a            | 0.0028683 | 0.0023457 | 0.00 | 1.22 | Hk2             | 0.0007059 | 0.0004283 | 0.00 | 1.65  |
| Idh1             | 0.0005199 | 0.0002176 | 0.00 | 2.39 | Slc3a2          | 0.0008617 | 0.0005178 | 0.00 | 1.66  |
| Cars             | 0.0002507 | 9.40E-05  | 0.00 | 2.67 | Map2k1          | 0.0002655 | 8.16E-05  | 0.00 | 3.25  |

Table S1: Continued

|         | R2i versus serum |           |      |        | 2i versus serum |           |           |      |        |
|---------|------------------|-----------|------|--------|-----------------|-----------|-----------|------|--------|
| Atp5c1  | 0.0007108        | 0.0004595 | 0.00 | 1.55   | Isoc2a          | 0.0012653 | 0.0002878 | 0.00 | 4.40   |
| Dhrs7   | 8.21E-05         | 1.63E-05  | 0.00 | 5.03   | Nop58           | 0.0001183 | 5.17E-05  | 0.00 | 2.29   |
| Mdh2    | 0.0022925        | 0.0014363 | 0.00 | 1.60   | Mdh2            | 0.0018758 | 0.0014423 | 0.00 | 1.30   |
| Alpl    | 0.0001397        | 6.14E-05  | 0.00 | 2.28   | Fip111          | 6.63E-05  | 1.04E-05  | 0.00 | 6.39   |
| Mgea5   | 5.04E-05         | 1.81E-05  | 0.00 | 2.79   | Pck2            | 0.0001901 | 1.41E-05  | 0.00 | 13.52  |
| Cfdp1   | 0.000258         | 3.15E-05  | 0.00 | 8.20   | Alpl            | 0.0001913 | 6.16E-05  | 0.00 | 3.10   |
| Khsrp   | 0.0004069        | 0.0002618 | 0.00 | 1.55   | Pfkip           | 0.0004272 | 9.04E-05  | 0.00 | 4.73   |
| Morc3   | 2.92E-05         | 5.83E-06  | 0.00 | 5.01   | Fn1             | 1.64E-05  | 2.50E-06  | 0.00 | 6.54   |
| Supt16  | 0.0001233        | 3.63E-05  | 0.00 | 3.40   | Rfc5            | 0.0002229 | 0.0001035 | 0.00 | 2.15   |
| Ints4   | 2.86E-05         | 5.75E-06  | 0.00 | 4.97   | Map4            | 6.44E-05  | 5.31E-06  | 0.00 | 12.12  |
| Dhx57   | 2.06E-05         | 4.15E-06  | 0.00 | 4.96   | Trap1           | 0.0011306 | 0.0008163 | 0.00 | 1.39   |
| Nt5c3b  | 0.0001035        | 2.08E-05  | 0.00 | 4.96   | Acaa1a          | 0.0003489 | 0.0001186 | 0.00 | 2.94   |
| Tbcb    | 0.0002942        | 0.0001288 | 0.00 | 2.28   | Prkag1          | 0.0002935 | 6.10E-05  | 0.00 | 4.81   |
| Rps10   | 0.0031389        | 0.0025317 | 0.00 | 1.24   | Ccdc12          | 0.0001941 | 9.90E-05  | 0.00 | 1.96   |
| Asns    | 0.0005315        | 0.0003579 | 0.00 | 1.49   | Idh2            | 0.000661  | 0.000176  | 0.00 | 3.76   |
| Usp48   | 8.14E-05         | 5.15E-06  | 0.00 | 15.80  | P4ha1           | 0.0001    | 1.02E-05  | 0.00 | 9.76   |
| Idh2    | 0.0005491        | 0.0001752 | 0.00 | 3.13   | Mthfd11         | 0.0004711 | 0.0002774 | 0.00 | 1.70   |
| Lap3    | 0.0005773        | 0.0003284 | 0.00 | 1.76   | Ferritin        | 0.0001902 | 2.52E-05  | 0.00 | 7.56   |
| Ivd     | 8.49E-05         | 1.34E-05  | 0.00 | 6.33   | Sars            | 0.0009207 | 0.0003598 | 0.00 | 2.56   |
| Map2k1  | 0.0002906        | 8.13E-05  | 0.00 | 3.58   | Tpi1            | 0.0026046 | 0.0017118 | 0.00 | 1.52   |
| Myo18a  | 2.07E-05         | 2.69E-06  | 0.00 | 7.70   | Eif4g2          | 4.61E-05  | 6.37E-06  | 0.00 | 7.23   |
| Isoc2a  | 0.0009665        | 0.0002866 | 0.00 | 3.37   | Sec61a2         | 0.0003092 | 1.20E-05  | 0.00 | 25.87  |
| Sec61a2 | 0.0002017        | 1.19E-05  | 0.00 | 16.94  | Shmt2           | 0.0005526 | 0.0002216 | 0.00 | 2.49   |
| Fanci   | 8.43E-05         | 4.02E-05  | 0.00 | 2.10   | Dhrs7           | 9.63E-05  | 1.64E-05  | 0.00 | 5.88   |
| Kif15   | 3.24E-05         | 1.16E-05  | 0.00 | 2.78   | Nup35           | 0.0001109 | 1.88E-05  | 0.00 | 5.88   |
| Plin3   | 0.0004773        | 0.0002059 | 0.00 | 2.32   | Tuba1c          | 0.0059271 | 1.25E-05  | 0.00 | 474.03 |
| Acaa2   | 0.0002036        | 1.49E-05  | 0.00 | 13.70  |                 |           |           |      |        |
| Pola1   | 3.09E-05         | 1.11E-05  | 0.00 | 2.77   |                 |           |           |      |        |
| Amdhd2  | 8.08E-05         | 1.43E-05  | 0.00 | 5.66   |                 |           |           |      |        |
| Cndp2   | 0.0003328        | 0.0001453 | 0.00 | 2.29   |                 |           |           |      |        |
| Ppm1b   | 7.53E-05         | 1.19E-05  | 0.00 | 6.32   |                 |           |           |      |        |
| Mfge8   | 6.83E-05         | 1.21E-05  | 0.00 | 5.63   |                 |           |           |      |        |
| Zmym2   | 2.26E-05         | 4.02E-06  | 0.00 | 5.63   |                 |           |           |      |        |
| Gtf2b   | 0.0001006        | 1.79E-05  | 0.00 | 5.63   |                 |           |           |      |        |
| Rbm26   | 3.16E-05         | 5.60E-06  | 0.00 | 5.63   |                 |           |           |      |        |
| Gna13   | 8.90E-05         | 1.41E-05  | 0.00 | 6.30   |                 |           |           |      |        |
| HORMA   | 0.0001839        | 7.90E-05  | 0.00 | 2.33   |                 |           |           |      |        |
| Krt76   | 4.94E-05         | 9.89E-06  | 0.00 | 4.99   |                 |           |           |      |        |
| Mindy3  | 6.25E-05         | 1.25E-05  | 0.00 | 4.99   |                 |           |           |      |        |
| Polr3c  | 5.11E-05         | 1.02E-05  | 0.00 | 4.99   |                 |           |           |      |        |
| Tuba3b  | 0.0044708        | 1.25E-05  | 0.00 | 359.07 |                 |           |           |      |        |
| Tuba1c  | 0.0068569        | 1.25E-05  | 0.00 | 550.70 |                 |           |           |      |        |
| Aldoc   | 0.0004767        | 1.58E-05  | 0.00 | 30.23  |                 |           |           |      |        |
